# Supplementary material
Source: Springer Nature journal article supplement (https://www.springermedizin.de/resource/supplementary/12865_2006_116_MOESM1_ESM.pdf/9428586)

**A.**

CD4+ (24 hrs)

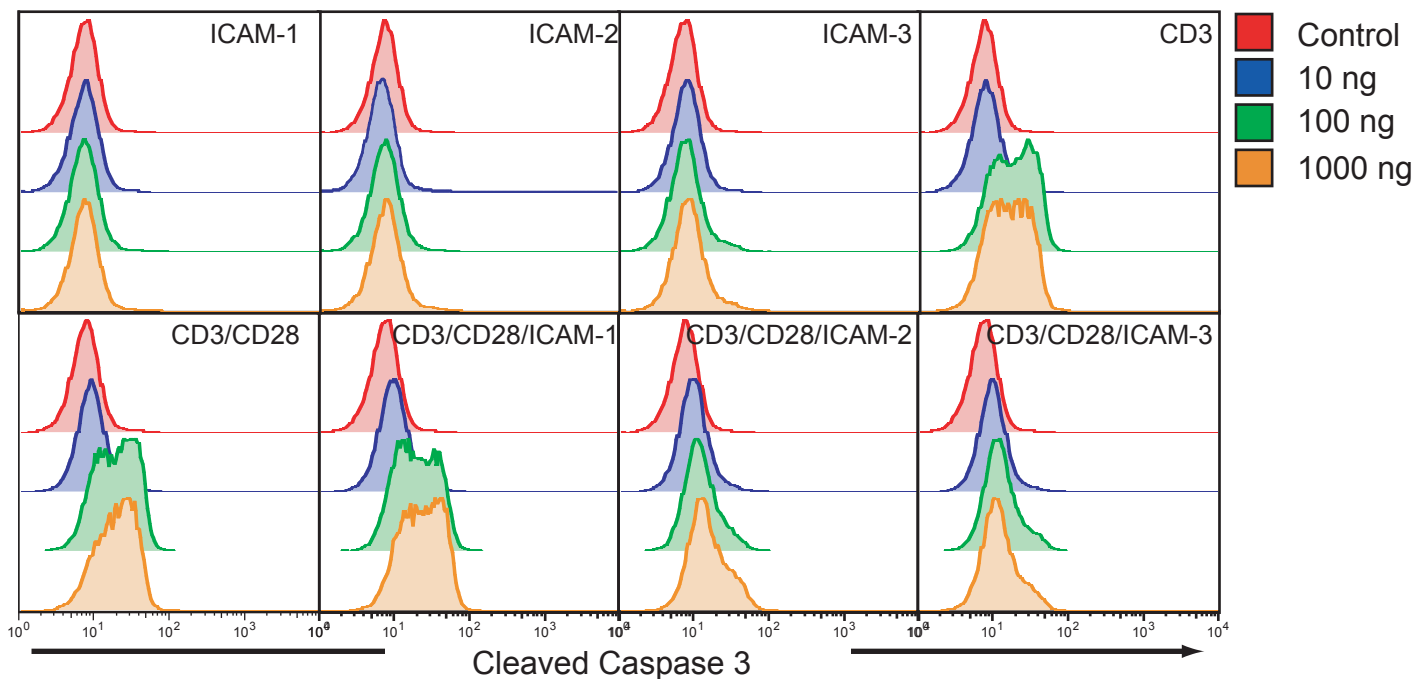**B.**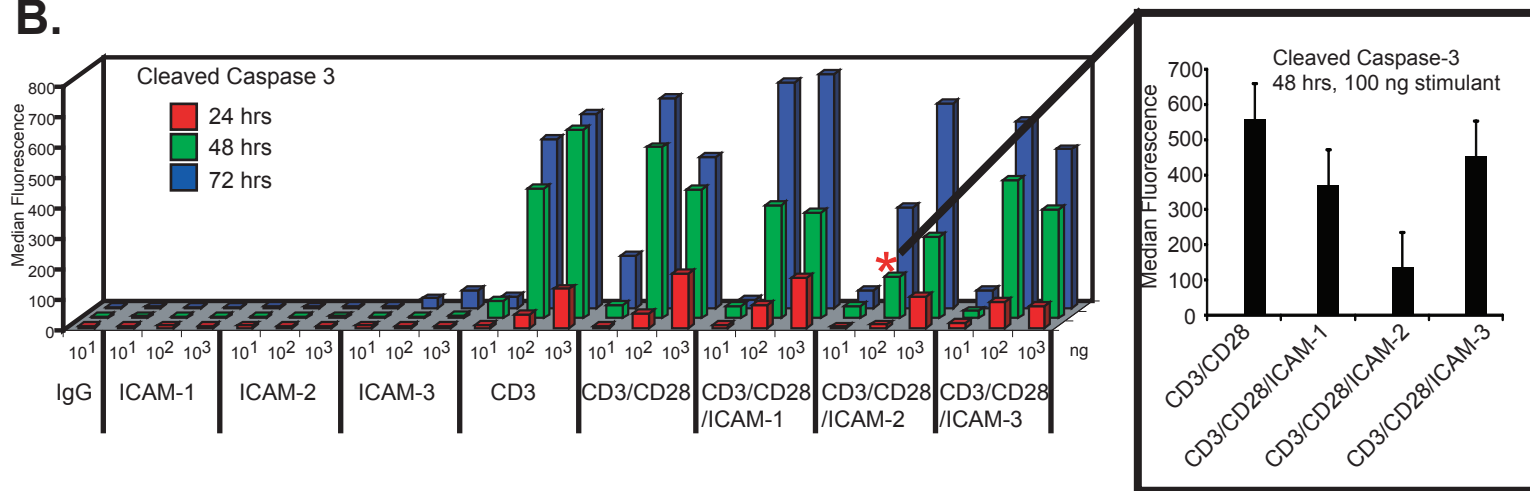**C.**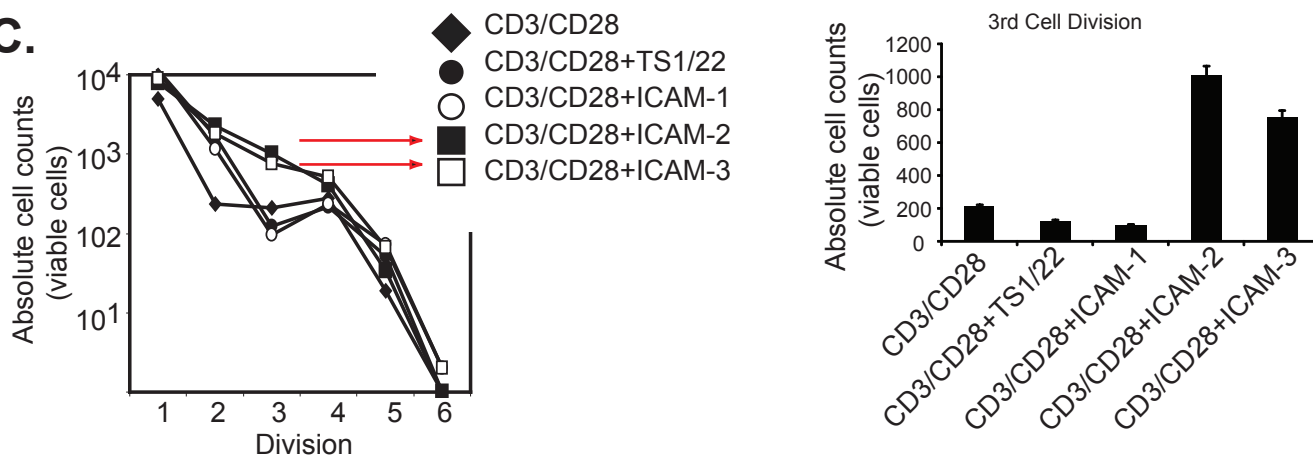

Supplement: MOESM1 [file 9428586]
